# Supplementary material
Source: publisher figshare collection journal article supplement (https://future-science-group.figshare.com/ndownloader/files/27894315)
Supplement: Supplementary file 1 [file 27894315]

## Sheet: Sheet1
Rab1A-shRNA-1
Forward-primer	CCGGGAGATTGTAAATGGTCAATACCTCGAGGTATTGACCATTTACAATCTCTTTTTG
reverse primer	AATTCAAAAAGAGATTGTAAATGGTCAATACCTCGAGGTATTGACCATTTACAATCTC
Rab1A-shRNA-2
Forward-primer	CCGGGAAAGCTACATCAGCACAATTCTCGAGAATTGTGCTGATGTAGCTTTCTTTTTG
reverse primer	AATTCAAAAAGAAAGCTACATCAGCACAATTCTCGAGAATTGTGCTGATGTAGCTTTC
